# Supplementary material for: Major Adverse Cardiovascular Events and Mortality Prediction by Circulating GDF-15 in Patients with Type 2 Diabetes: A Systematic Review and Meta-Analysis
Source: MDPI journal article supplement (doi:10.3390/biom12070934), 2022-07-04
Supplement: s1 [file s1]

## Supplementary Materials

**Table S1.** Format and details of source data from the 8 studies included in the meta-analysis.

| Study (year)                 | Original unit of estimated<br>HR for<br>GDF-15 concentration | Expression of<br>average GDF-15<br>levels        | Measurement of dispersion<br>of GDF-15 levels (pg/ml) |                                           | GDF-15<br>quantification assay               | Ref. |
|------------------------------|--------------------------------------------------------------|--------------------------------------------------|-------------------------------------------------------|-------------------------------------------|----------------------------------------------|------|
| Carlsson et al. (2020)       | Per SD of $\log_2$ (GDF-15)                                  | N/A                                              | N/A                                                   |                                           | Multiplex CVD I 96x96<br>kit (Olink Proseek) | [14] |
| Cavusoglu et al. (2015)      | Per SD of $\log$ (GDF-15)                                    | Median (25 <sup>th</sup> ,<br>75 <sup>th</sup> ) | PLTP <17.44:<br>1134 (855,<br>1557)                   | PLTP $\geq$ 17.44:<br>1365 (961,<br>2050) | ELISA (R&D<br>Systems)                       | [24] |
| Frimodt-Møller et al. (2018) | Per SD of $\log_2$ (GDF-15)                                  | Median (IQR)                                     | 1533 (1132–2236)                                      |                                           | Elecsys 2010 (Roche)                         | [13] |
| Gerstein et al. (2015)       | Per SD of $\log$ (GDF-15)                                    | N/A                                              | N/A                                                   |                                           | Human DiscoveryMAP<br>(Rules-Based Medicine) | [25] |
| Pavo et al. (2016)           | Per IQR of $\log$ (GDF-15)                                   | Median (IQR)                                     | 1391 (881–2176)                                       |                                           | ELISA (Roche)                                | [26] |
| Resl et al. (2016)           | Per $\log$ (GDF-15)                                          | Median (IQR)                                     | 1474 (906–2178)                                       |                                           | ELISA (Roche)                                | [27] |
| Sen et al. (2021)            | Per doubling $\log$ (GDF-15)                                 | Median (IQR)                                     | 1774 (1242–2514)                                      |                                           | Elecsys (Roche)                              | [20] |
| Sharma et al. (2020)         | Per $\log_2$ (GDF-15)                                        | Median                                           | 1246                                                  |                                           | ELISA (Roche)                                | [28] |

ELISA, enzyme-linked immunosorbent assay; GDF-15, growth differentiation factor-15; HR, hazard ratio; IQR, interquartile range;  $\log$ , logarithmic transformations; N/A, not applicable or available; P, plasma; PLTP, phospholipid protein; S, serum; SD, standard deviation.

**Table S2.** Summary table of included studies with harmonized hazard ratios and the harmonization methodology used (see text for details)

| Study (year)                 | Original unit of estimated HR for GDF-15 concentration | Expression of average GDF-15 levels           | Original estimate of CVD outcomes* | Harmonized estimate of CVD outcomes* | Original estimate of all-cause mortality* | Harmonized estimate of all-cause mortality* | Harmonization methodology | [Ref.] |
|------------------------------|--------------------------------------------------------|-----------------------------------------------|------------------------------------|--------------------------------------|-------------------------------------------|---------------------------------------------|---------------------------|--------|
| Carlsson et al. (2020)       | Per SD of log <sub>2</sub> (GDF-15)                    | N/A                                           | 1.34 (0.96–1.87)                   | 1.34 (0.97–1.86)                     | N/A                                       | N/A                                         | N/A                       | [14]   |
| Cavusoglu et al. (2015)      | Per SD of log(GDF-15)                                  | Median (25 <sup>th</sup> , 75 <sup>th</sup> ) | N/A                                | N/A                                  | 1.91 (1.47–2.49)                          | 1.57 (1.31–1.88)                            | Eqn. (1)                  | [24]   |
| Frimodt-Møller et al. (2018) | Per SD of log <sub>2</sub> (GDF-15)                    | Median (IQR)                                  | 1.25 (0.85–1.84)                   | 1.25 (0.85–1.84)                     | 1.90 (1.24–2.89)                          | 1.90 (1.24–2.91)                            | N/A                       | [13]   |
| Gerstein et al. (2015)       | Per SD of log(GDF-15)                                  | N/A                                           | 1.18 (1.12–1.24)                   | 1.12 (1.08–1.16)                     | 1.29 (1.20–1.38)                          | 1.19 (1.13–1.25)                            | Eqn. (1)                  | [25]   |
| Pavo et al. (2016)           | Per IQR of log(GDF-15)                                 | Median (IQR)                                  | 2.23 (1.79–2.78)                   | 1.74 (1.50–2.03)                     | 3.55 (2.60–4.84)                          | 2.41 (1.94–2.99)                            | Eqn. (1), (2) & (3)       | [26]   |
| Resl et al. (2016)           | Per log(GDF-15)                                        | Median (IQR)                                  | 1.37 (1.12–1.68)                   | 1.24 (1.08–1.43)                     | N/A                                       | N/A                                         | Eqn. (1), (2) & (3)       | [27]   |
| Sen et al. (2021)            | Per doubling log(GDF-15)                               | Median (IQR)                                  | 1.20 (1.04–1.38)                   | 1.05 (1.01–1.09)                     | 1.32 (1.14–1.54)                          | 1.08 (1.03–1.12)                            | Eqn. (1), (2) & (3)       | [20]   |
| Sharma et al. (2020)         | Per log <sub>2</sub> (GDF-15)                          | Median                                        | 1.15 (1.04–1.27)                   | 1.13 (1.03–1.23)                     | N/A                                       | N/A                                         | Eqn. (2) & (3)            | [28]   |

Eqn., equation; HR, hazard ratio; IQR, interquartile range; log, logarithmic transformations; N/A, not applicable/available, ref., reference number, SD, standard deviation.

\*effect size estimates were expressed in adjusted hazard ratios (95% confident interval).

**Table S3.** Assessment of quality of studies using the Newcastle-Ottawa scale.

|                        |                                                                        | Study [Ref. no.]     |                      |                            |                      |                  |                  |                 |                    |
|------------------------|------------------------------------------------------------------------|----------------------|----------------------|----------------------------|----------------------|------------------|------------------|-----------------|--------------------|
|                        |                                                                        | Carlsson et al. [14] | Cavusoglu et al.[24] | Frimodt-Møller et al. [13] | Gerstein et al. [25] | Pavo et al. [26] | Resl et al. [27] | Sen et al. [20] | Sharma et al. [28] |
| Components             |                                                                        |                      |                      |                            |                      |                  |                  |                 |                    |
| Selection              | Representative of the exposed cohort                                   | ★                    | ★                    | ★                          | ★                    | ★                | ★                | ★               | ★                  |
|                        | Selection of external cohort                                           | ★                    | ★                    | –                          | –                    | –                | –                | ★               | ★                  |
|                        | Ascertainment of exposure <sup>a</sup>                                 | ★                    | ★                    | ★                          | ★                    | ★                | ★                | ★               | ★                  |
|                        | Outcome of interest not present at the start of the study <sup>b</sup> | ★                    | –                    | ★                          | ★                    | ★                | ★                | ★               | ★                  |
| Comparability          | Comparability of cohorts <sup>c</sup> : main factor                    | ★                    | ★                    | ★                          | ★                    | –                | ★                | ★               | ★                  |
|                        | Comparability of cohorts <sup>d</sup> : additional factor              | ★                    | ★                    | ★                          | ★                    | –                | ★                | ★               | ★                  |
| Outcome                | Assessment of outcome                                                  | ★                    | ★                    | ★                          | ★                    | ★                | ★                | ★               | ★                  |
|                        | Sufficient follow-up time <sup>e</sup>                                 | –                    | ★                    | ★                          | ★                    | ★                | ★                | ★               | ★                  |
|                        | Adequacy of follow-up                                                  | ★                    | ★                    | ★                          | ★                    | ★                | ★                | ★               | ★                  |
| Total score (out of 9) |                                                                        | 8                    | 8                    | 8                          | 8                    | 8                | 6                | 8               | 9                  |

A total score of ≥6 points indicates good quality.

<sup>a</sup>One star was assigned if details about measurement of blood GDF-15 concentration were provided.

<sup>b</sup>One star was assigned if a CVD outcome(s) of interest was not available at the start of study.

<sup>c</sup>One star was assigned for a study that controlled for age.

<sup>d</sup>One star was assigned to a study that controlled for additional factors apart from age.

<sup>e</sup>One star was assigned for mean or median follow-up duration of ≥5 years. –, not applicable

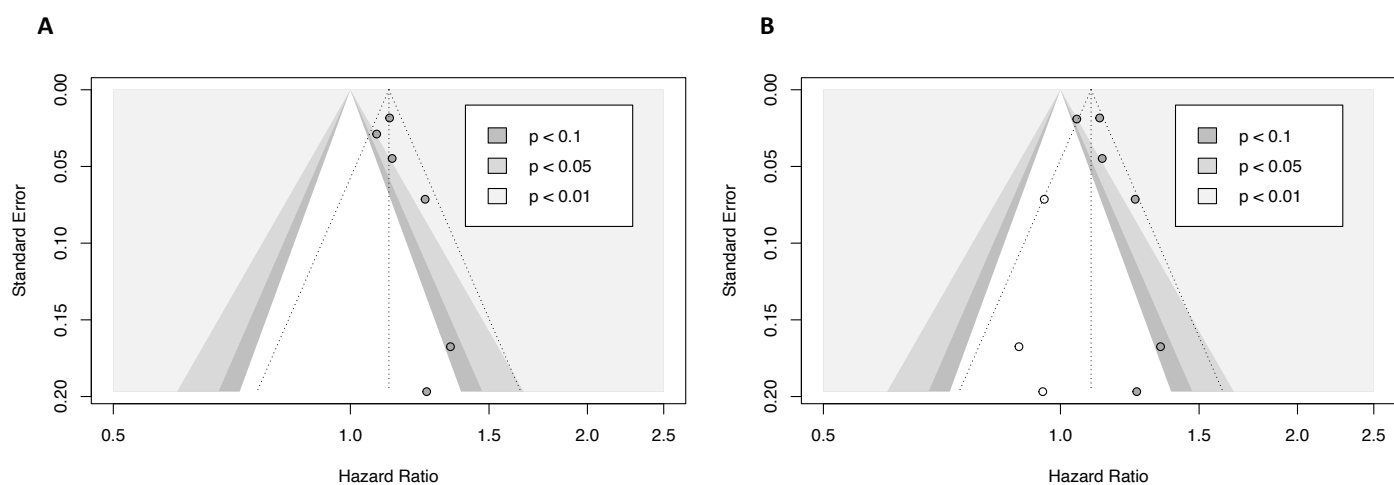

**Figure S1.** Funnel plots assessing publication bias in the meta-analysis of A) MACE. Effect corrected by small-study bias by Duval and Tweedie's trim and fill test B) shared similar size as pooled effect size A).
